# Supplementary material for: The impact of chemical and hormonal treatments to improve seed germination and seedling growth of Juniperus procera Hochst. ex Endi
Source: PeerJ. 2024 Apr 10;12:e17236. doi: 10.7717/peerj.17236 (PMC11015829; doi:10.7717/peerj.17236)
Supplement: Supplemental Information 1 [file peerj-12-17236-s001.xlsx]

## Sheet: Sheet1
IAA
	1	2	3
1	228.1	227.8	227.9
2	230.7	225.7	235.7
3	179.8	180.8	181.8
4	168.3	160.3	164.3
5	147.1	145.1	149.1
6	141	138	135
7	54.3	54	54.6
8	40.1	43.1	46.1
GA
	1	2	3
1	1408.2	1406.6	1410.4
2	1750.9	1746.7	1748.8
3	1794.1	1796.2	1798.3
4	1873.1	1875.1	1877.1
5	1225.6	1223.3	1227.9
6	1305.9	1295.7	1300.8
7	799.8	798.9	800.9
8	819.9	817.8	815.7
kiniten
	1	2	3
1	346.333	345	347.7
2	255.9	253.9	257.9
3	378.8	376.8	380.8
4	445.4	440.2	450.6
5	495.7	490.7	500.7
6	576.7	576.5	576.9
7	129.8	128.7	130.9
8	128.1	128	128.2
ABA
	1	2	3
1	21.9	20.8	23
2	20.5	20	21
3	12.07	12.04	12.1
4	14.1133	13.02	15.2
5	17.07	16.06	18.08
6	25.7	22.5	28.9
7	30.9	28.8	33
8	38.6	36.5	40.7
Shoot length
	1	2	3
1	3.2	3.4	3.6
2	3.7	3.5	3.6
3	3	3.1	3.2
4	3.3	2.9	2.5
5	2.9	3.1	2.7
6	2.8	2.5	3.1
7	2	2.1	2.2
8	2	2	2
Root length
	1	2	3
1	6.5	6.7	6.9
2	7.9	7.3	7.6
3	5.6	5.4	5.8
4	5.4	5	5.2
5	4	4.5	5
6	4.1	3.5	3.8
7	3.1	3	3.2
8	3.6	2.8	3.2
Fresh weight
	1	2	3
1	0.15	0.17	0.19
2	0.18	0.2	0.19
3	0.15	0.16	0.14
4	0.11	0.1	0.09
5	0.13	0.11	0.15
6	0.14	0.11	0.12
7	0.1	0.08	0.12
8	0.1	0.11	0.12
Dry weight
	1	2	3
1	0.03	0.02	0.04
2	0.03	0.05	0.07
3	0.08	0.06	0.07
4	0.09	0.03	0.06
5	0.02	0.021	0.022
6	0.023	0.02	0.007
7	0.01	0.03	0.008
8	0.012	0.012	0.012
chla
	1	2	3
1	285.1	280	290.2
2	312.4	314.4	316.4
3	400.6	401.6	402.6
4	382	379	380.5
5	266.2	270.6	268.4
6	239.2	235.2	237.2
7	197.7	195.5	199.9
8	172.1	170	174.2
chlb
	1	2	3
1	101	98.5	96
2	97.8	98.9	100
3	121.6	118.3	124.9
4	118.7	117.6	119.8
5	93.9	90.8	97
6	74.8	70	72.4
7	62.8	60.8	61.8
8	50.6	45.3	40
Total soluble sugars
	1	2	3
1	3.3	3.5	3.7
2	5.9	5.6	5.3
3	7.6	7.5	7.7
4	6.8	7	6.9
5	5	5.2	5.1
6	5.3	4.5	4.9
7	3.6	3.7	3.8
8	3.7	3.5	3.9
proteins
	1	2	3
1	7	7.3	7.6
2	7.8	8	7.6
3	10.5	11.1	9.9
4	10	10.1	10.2
5	6.5	6.7	6.6
6	6	7	6.5
7	6	5.6	5.8
8	3.5	4	4.5
oil
	1	2	3
1	36.7	40.8	44.9
2	60	50	55
3	68.5	69	68
4	58	61	55
5	46.9	44.6	42.3
6	29.9	23.5	26.7
7	18	18.4	18.2
8	19.6	23.8	21.7
